# Supplementary material
Source: PubMed Central journal article supplement (PMC3232818)
Supplement: supp_55.12.5761_TablesS1-S4.pdf [file supp_55.12.5761_TablesS1-S4.pdf]

1 **On-line Supplement for:**

2

3 **PhoQ mutations promote lipid A modification and polymyxin resistance of**

4 ***Pseudomonas aeruginosa* found in colistin-treated cystic fibrosis patients**

5

6 Amanda K. Miller, Mark K. Brannon, Laurel Stevens, Helle Krogh Johansen, Sara E. Selgrade,

7 Samuel I. Miller, Niels Høiby, and Samuel M. Moskowitz\*

8

9 **\*Corresponding author:** Division of Pediatric Pulmonary Medicine

10 Massachusetts General Hospital

11 175 Cambridge Street

12 Boston, Massachusetts 02114

13 Telephone: 617-643-7232; Fax: 617-643-7234

14 Email: smoskowitz@partners.org

15

16

16

17 **Table S1.** Oligonucleotide primers for sequencing.

| Primer name             | Primer no. | Sequence (5' to 3')       |
|-------------------------|------------|---------------------------|
| pDONR201 attL1 (F)      | SM877      | TCGCGTTAACGCTAGCATGGATCTC |
| pDONR201 attL2 (R)      | SM878      | GTAACATCAGAGATTTTGAGACAC  |
| in <i>phoPQ</i> – 1 (F) | SM1010     | CTGGAAGCGCGCCTGAACG       |
| in <i>phoPQ</i> – 2 (F) | SM1011     | GGCGGTGCTGTTCATGCTGG      |
| in <i>phoPQ</i> – 3 (F) | SM1012     | GCAGCTCTACCTGTGGCTCG      |
| in <i>phoPQ</i> – 4 (F) | SM1013     | TGCGACGCGCTGGACAAGG       |
| in <i>phoPQ</i> – 1 (R) | SM1014     | GATGGTCGACTGGACGAACC      |
| in <i>phoPQ</i> – 2 (R) | SM1015     | TCCAGGGCGATGCCGAAGG       |
| in <i>phoPQ</i> – 3 (R) | SM1016     | CCCCAGGTCAGACCCAGCC       |
| in <i>phoPQ</i> – 4 (R) | SM1017     | TGGACGGCGAGAAGTCCCG       |

18

**Table S2.** Oligonucleotide primers for deletion constructs.

| Primer name                           | Primer no. | Sequence (5' to 3')                                    |
|---------------------------------------|------------|--------------------------------------------------------|
| <i>ΔphoPQ</i> - 5' flanking           | SM936      | GGAACAGGCAGATCACGAGAA                                  |
| <i>ΔphoPQ</i> - 5' delete (F) + attB1 | SM937      | GGGGACAAGTTTGTACAAAAAAGC<br>AGGCTGACTGTAGAAAGCCTAGACCC |
| <i>ΔphoPQ</i> - 5' delete (R)         | SM938      | GTCTCAGACTGTAGCGAAACGAAGC<br>TTTACCAGCAGTTTCATGAG      |
| <i>ΔphoPQ</i> - 3' delete (F)         | SM939      | CTCATGAAACTGCTGGTAAAGCTTC<br>GTTTCGCTACAGTCTGAGAC      |
| <i>ΔphoPQ</i> - 3' delete (R) + attB2 | SM940      | GGGGACCACTTTGTACAAGAAAGC<br>TGGGTAGCACGGCGATGAAACAGGTG |
| <i>ΔphoPQ</i> - 3' flanking           | SM941      | GCGGGAATGAGGGTCAAGGC                                   |
| <i>ΔphoPQ</i> - 5' delete (F)         | SS97       | GGCTAGTCTAGACAGATCACGAGAAACAGG                         |
| <i>ΔphoPQ</i> - 5' delete (R)         | SS99       | GAACGGCCGCCAAGTCTCAGGATCCCATGAG<br>GTTCTCCGGATG        |
| <i>ΔphoPQ</i> - 3' delete (F)         | SS98       | CATCCGGAGGAACCTCATGGGATCCTGAGAC<br>TTGGCGGCCGTTT       |
| <i>ΔphoPQ</i> - 3' delete (R)         | SS93       | CTCCAAGCTTCATGATCACCGAGACCAG                           |
| <i>ΔphoQ</i> - 5' flanking            | SM942      | ATGTCGGCTACGCTGCCGGG                                   |
| <i>ΔphoQ</i> - 5' delete (F) + attB1  | SM943      | GGGGACAAGTTTGTACAAAAAAGC<br>AGGCTAGAATGCCTCGATCGAAGGCG |
| <i>ΔphoQ</i> - 5' delete (R)          | SM944      | GTCTCAGACTGTAGCGAAACGAA<br>GCTTCAGGGAACGGATCACCGG      |
| <i>ΔphoQ</i> - 3' delete (F)          | SM945      | CCGGTGATCCGTTCCCTGAAGCTTC<br>GTTTCGCTACAGTCTGAGAC      |
| <i>ΔphoQ</i> - 3' delete (R) + attB2  | SM946      | GGGGACCACTTTGTACAAGAAAGC<br>TGGGTCCGGGAATGAGGGTCAAGGCC |
| <i>ΔphoQ</i> - 3' flanking            | SM947      | CGGCTGCGCTCCATGATCAC                                   |

**Table S3.** Oligonucleotide primers for expression constructs.

| Primer name*                                      | Primer no. | Sequence (5' to 3')                                          |
|---------------------------------------------------|------------|--------------------------------------------------------------|
| <i>phoPQ</i> (F) + attB1                          | SM855      | GGGGACAAGTTTGTACAAAAAAGC<br>AGGCTCTCATCCGGAGGAACCTCATGAAA    |
| <i>phoPQ</i> (R) + attB2                          | SM856      | GGGGACCACTTTGTACAAGAAAGC<br>TGGGTGTCTCAGACTGTAGCGAAACGTAT    |
| <i>phoP</i> (R) + attB2                           | SM1022     | GGGGACCACTTTGTACAAGAAAGC<br>TGGGTTCGGATCACCGGCAGCGCTCGG      |
| <i>phoPQ11</i> (R) + attB2                        | SM1023     | GGGGACCACTTTGTACAAGAAAGC<br>TGGGTGTCTCAGTCCAGCGCCACGGCCAGGCC |
| <i>phoPQ12</i> (R) + attB2                        | SM1024     | GGGGACCACTTTGTACAAGAAAGC<br>TGGGTGTCTCAGTCCAGGCTCAGTTCGCCGTC |
| <i>phoP</i> <sup>+</sup> <i>phoQ24</i> SOE 5' (R) | SM1036     | CCGCGCACCGTATCGATCG                                          |
| <i>phoP</i> <sup>+</sup> <i>phoQ24</i> SOE 3' (F) | SM1037     | CGATCGATACGGTGCGCGG                                          |

\*SOE = splicing by overlap extension

**Table S4.** Oligonucleotide primers for promoter fusion construct.

| Primer name                 | Primer no. | Sequence (5' to 3')                   |
|-----------------------------|------------|---------------------------------------|
| <i>P<sub>pmrH</sub></i> (F) | SS100      | GAGAGAGAATTCTGGTCGCCGGCAGCCGCTGAAG    |
| <i>P<sub>pmrH</sub></i> (R) | SS101      | AGAGAGGGATCCTCACCGGTGGTGATCCAGCCGGAAC |
| CTX - 5' flanking           | SS102      | CGAGTGGTTTAAGGCAACGGTCTTGA            |
| CTX - 3' flanking           | SS103      | AGTTCGGCCTGGTGGAACAACCTCG             |
